# Supplementary material
Source: Springer Nature journal article supplement (https://www.springermedizin.de/resource/supplementary/12883_2013_954_MOESM1_ESM.pdf/9456518)
Supplement: MOESM1 [file 9456518]

| Studies                                      | Estimate (95% C.I.)         | Ev/Trt        | Ev/Ctrl       |
|----------------------------------------------|-----------------------------|---------------|---------------|
| Hughes et al 2010                            | 0.580 (0.186, 1.811)        | 12/35         | 9/19          |
| Zinman et al 2005                            | 4.000 (0.299, 53.468)       | 4/5           | 4/8           |
| Leger et al 2001                             | 12.250 (1.327, 113.060)     | 7/9           | 2/9           |
| Vermeulen et al 2010                         | 1.212 (0.216, 6.800)        | 4/15          | 3/13          |
| Latov et al 2010                             | 4.543 (2.009, 10.275)       | 32/59         | 12/58         |
| Kuitwaard et al 2010                         | 1.111 (0.213, 5.802)        | 10/14         | 9/13          |
| Dalakas et al 2009                           | 12.789 (0.613, 266.659)     | 4/13          | 0/13          |
| Eftimov et al 2012                           | 1.190 (0.325, 4.356)        | 10/24         | 6/16          |
| <b>Overall (I<sup>2</sup>=50% , P=0.050)</b> | <b>2.098 (0.955, 4.609)</b> | <b>83/174</b> | <b>45/149</b> |

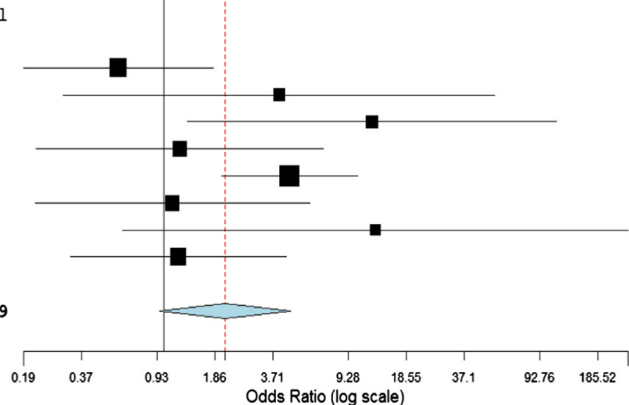

## Weights

| Studies              | Percentage |
|----------------------|------------|
| Hughes et al 2010    | 17.5       |
| Zinman et al 2005    | 6.9        |
| Leger et al 2001     | 8.6        |
| Vermeulen et al 2010 | 11.9       |
| Latov et al 2010     | 21.4       |
| Kuitwaard et al 2010 | 12.5       |
| Dalakas et al 2009   | 5.4        |
| Eftimov et al 2012   | 15.8       |
